# Supplementary material
Source: HighWire-hosted journal article supplement (https://ijgc.bmj.com/highwire/filestream/19904/field_highwire_adjunct_files/0/ijgc-2021-002761supp001_data_supplement.pdf)
Supplement: ijgc-2021-002761supp001_data_supplement.pdf [file ijgc-2021-002761supp001_data_supplement.pdf]

Table. Summary of tips for carrying out the procedure.

|                                                                                        |                                                                                                                            |
|----------------------------------------------------------------------------------------|----------------------------------------------------------------------------------------------------------------------------|
| Selection of the case                                                                  | Be sure about the disease location (Physical examination, imaging).                                                        |
| Sentinel node                                                                          | It is advisable to perform both technetium tracer and indocyanine green.                                                   |
| Margin setting                                                                         | Use Kocher clamps to set distal margins on the vaginal wall.                                                               |
| Vaginal dissection                                                                     | Use Epinephrine (1mg) diluted on the saline solution (200ml) around the vaginal wall.                                      |
| Secure specimen removal                                                                | Incise the uterine cervix close to the isthmus and use mixer forceps to seal the vaginal wall and incise distally from it. |
| Stabilizing uterine corpus with the neovagina                                          | Use a foley catheter inserted in the endometrial cavity, sutured with absorbable stitch, to guide the neovagina.           |
| Potential procedures to prevent neovagina anastomotic stenosis (not used in this case) | Z-plasty, double-lumen ileal pouch, spatulating anastomotic ends.                                                          |
